# Supplementary material for: Effectiveness of Early Warning Scores for Early Severity Assessment in Outpatient Emergency Care: A Systematic Review
Source: PubMed Central journal article supplement (PMC9330632; doi:10.3389/fpubh.2022.894906), 2022-07-14
Supplement: Table_1.pdf [file Table_1.pdf]

ANNEX 1: Parameters analyzed in the evaluated scales.

|            | BF | O2 SAT | Fi O2 | HR | SBP | T | AVPU | DIURESIS | AGE | TRAUMA | GLUCOSE | LACTATE | GCS |
|------------|----|--------|-------|----|-----|---|------|----------|-----|--------|---------|---------|-----|
| EWS        | √  | √      |       | √  | √   | √ | √    |          |     |        |         |         |     |
| NEWS       | √  | √      |       | √  | √   | √ | √    |          |     |        |         |         |     |
| NEWS 2     | √  | √      | √     | √  | √   | √ | √    |          |     |        |         |         |     |
| NEWS2-gluc | √  | √      | √     | √  | √   | √ | √    |          |     |        | √       |         |     |
| NEWS2-L    | √  | √      | √     | √  | √   | √ | √    |          |     |        |         | √       |     |
| MEWS       | √  |        |       | √  | √   | √ | √    | √        |     |        |         |         |     |
| PMEWS      | √  | √      |       | √  | √   | √ | √    |          |     |        |         |         |     |
| MEWS GCS   | √  |        |       | √  | √   | √ | √    |          |     |        |         |         | √   |
| ViEWS      | √  | √      | √     | √  | √   | √ | √    |          |     |        |         |         |     |
| PhViEWS    | √  | √      | √     | √  | √   | √ | √    |          |     |        |         |         |     |
| AbViEWS    | √  | √      | √     | √  | √   | √ | √    |          |     |        |         |         |     |
| REMS       | √  | √      |       | √  | √   |   | √    |          | √   |        |         |         |     |
| MREMS      | √  | √      |       | √  | √   |   |      |          | √   |        |         |         | √   |
| SWES       | √  | √      |       | √  | √   | √ | √    |          |     |        |         |         |     |
| TREWS      | √  | √      |       | √  | √   | √ | √    |          |     | √      |         |         |     |
| HEWS       | √  | √      | √     | √  | √   | √ | √    |          |     |        |         |         |     |
| PRS        | √  | √      |       | √  | √   |   | √    |          |     |        |         |         |     |
| nzPHEWS    | √  | √      | √     | √  | √   | √ | √    |          |     |        |         |         |     |
| WPSS       | √  | √      |       | √  | √   | √ | √    |          |     |        |         |         |     |
| PI         | √  |        |       | √  | √   |   | √    |          |     |        |         |         |     |
| RAPS       | √  |        |       | √  | √   |   |      |          |     |        |         |         | √   |
| P.         | √  | √      |       | √  | √   |   |      |          | √   |        |         |         | √   |
| GOODACRE   |    |        |       |    |     |   |      |          |     |        |         |         |     |
| P.         | √  | √      |       | √  | √   | √ | √    |          |     |        |         |         |     |
| GROARKE    |    |        |       |    |     |   |      |          |     |        |         |         |     |
| GAP        |    |        |       |    | √   |   |      |          | √   |        |         |         | √   |
| VSS        | √  | √      |       | √  | √   |   |      |          |     |        |         |         | √   |
| VSG        | √  | √      |       | √  | √   | √ |      |          |     |        |         |         | √   |

EWS: Early Warning Score

NEWS 2 (NEWS): National Early Warning Score

NEWS-gluc: National Early Warning Score + glucose

NEWS2-L: National Early Warning Score + lactate

MEWS: Modified Early Warning Score

PMEWS: Pandemic Medical Early Warning Score

MEWS GCS: Modified EWS with Glasgow Coma Scale

ViEWS: VitalPac Early Warning Score

PhViEWS: Prehospital applied VitalPAC™ Early Warning Score

AbViEWS: Abbreviated VitalPac Early Warning Score

REMS: Rapid Emergency Medicine Score  
MREMS: Modified Rapid Emergency Medicine Score  
SWES: Scottish Early Warning Score  
TREWS: Triage Early Warning Score  
HEWS: Hamilton Early Warning Score  
PRS: Prehospital risk score  
nzNEWS: New Zealand Prehospital Early Warning Score  
WPPS: Worthing Physiological Scoring System  
PI: Prehospital Index  
RAPS: Rapid Acute Physiology Score  
P. GOODACRE: Goodacre Score  
P. GROARKE: Groarke Score  
GAP: Glasgow Coma Scale-Age-Systolic Blood Pressure Score  
VSS: Vital Sign Score  
VSG: Vital Sign Group Scores  
BF = Breathing Rate  
O2 SAT = Oxygen Saturation  
HR = Heart Rate  
SBP = Systolic blood pressure  
T = Temperature  
GCS = Glasgow Coma Scale
